# Supplementary material
Source: MDPI journal article supplement (https://www.mdpi.com/2072-4292/15/2/494)
Supplement: s1 [file s1]

**Table S1.** Optimal segmentations determined through visual inspections for Almería study site, winter season, and WorldView-3 orthoimages (Percent and 16Bits). SP: MRS segmentation scale. I: Interpreter. The best segmentation (1), the worst (10).

| Ranking based on visual interpretation          |     |    |    |    |    |    |     |        |
|-------------------------------------------------|-----|----|----|----|----|----|-----|--------|
|                                                 | SP  | I1 | I2 | I3 | I4 | I5 | I6  | Median |
| <b>Almeria<br/>December<br/>WV3<br/>Percent</b> | 35  | 5  | 3  | 5  | 10 | 4  | 8   | 5.0    |
|                                                 | 40  | 4  | 2  | 6  | 7  | 3  | 10  | 5.0    |
|                                                 | 45  | 2  | 1  | 4  | 3  | 5  | 3   | 3.0    |
|                                                 | 50  | 1  | 4  | 1  | 1  | 6  | 1   | 1.0    |
|                                                 | 55  | 3  | 5  | 2  | 4  | 1  | 5   | 3.5    |
|                                                 | 60  | 6  | 6  | 6  | 3  | 5  | 2   | 4.0    |
|                                                 | 65  | 7  | 7  | 7  | 2  | 8  | 4   | 7.0    |
|                                                 | 70  | 8  | 8  | 8  | 6  | 7  | 7   | 7.5    |
|                                                 | 75  | 9  | 9  | 9  | 8  | 9  | 6   | 9.0    |
| 80                                              | 10  | 10 | 10 | 10 | 9  | 10 | 9   | 10.0   |
| <b>Almeria<br/>December<br/>WV3<br/>16Bits</b>  | 180 | 10 | 9  | 9  | 10 | 10 | 10  | 10.0   |
|                                                 | 220 | 9  | 10 | 10 | 9  | 9  | 9   | 9.0    |
|                                                 | 260 | 8  | 7  | 8  | 8  | 8  | 7   | 8.0    |
|                                                 | 300 | 7  | 6  | 7  | 7  | 6  | 6   | 6.5    |
|                                                 | 340 | 6  | 4  | 6  | 6  | 5  | 4   | 5.5    |
|                                                 | 380 | 4  | 1  | 5  | 5  | 4  | 5   | 4.5    |
|                                                 | 420 | 1  | 2  | 3  | 2  | 1  | 3   | 2.0    |
|                                                 | 460 | 2  | 3  | 4  | 1  | 2  | 1   | 2.0    |
|                                                 | 500 | 3  | 5  | 1  | 3  | 3  | 2   | 3.0    |
| 540                                             | 5   | 8  | 2  | 4  | 7  | 8  | 6.0 |        |

**Table S2.** Optimal segmentations determined through visual inspections for Almería study site, winter season, and Sentinel-2 orthoimages (Percent and 16Bits). SP: MRS segmentation scale. I: Interpreter. The best segmentation (1), the worst (10).

| Ranking based on visual interpretation |                                  |    |    |    |    |    |    |        |
|----------------------------------------|----------------------------------|----|----|----|----|----|----|--------|
|                                        | SP                               | I1 | I2 | I3 | I4 | I5 | I6 | Median |
| Almeria<br>December<br>S2<br>Percent   | 2                                | 8  | 9  | 10 | 10 | 10 | 10 | 10.0   |
|                                        | 3                                | 5  | 8  | 9  | 9  | 7  | 9  | 8.5    |
|                                        | 4                                | 3  | 4  | 8  | 5  | 4  | 8  | 4.5    |
|                                        | 5                                | 1  | 2  | 4  | 2  | 3  | 7  | 2.5    |
|                                        | 6                                | 2  | 1  | 1  | 1  | 2  | 2  | 1.5    |
|                                        | 7                                | 4  | 3  | 2  | 2  | 4  | 1  | 2.5    |
|                                        | 8                                | 6  | 5  | 7  | 3  | 8  | 3  | 5.5    |
|                                        | 9                                | 7  | 7  | 5  | 6  | 5  | 5  | 5.5    |
|                                        | 10                               | 9  | 6  | 6  | 7  | 9  | 4  | 6.5    |
|                                        | 11                               | 10 | 10 | 3  | 8  | 6  | 6  | 7.0    |
|                                        | Almeria<br>December<br>S2 16Bits | 15 | 10 | 7  | 10 | 10 | 10 | 10     |
| 20                                     |                                  | 9  | 9  | 9  | 9  | 8  | 9  | 9      |
| 25                                     |                                  | 6  | 6  | 8  | 8  | 7  | 6  | 6.5    |
| 30                                     |                                  | 4  | 4  | 7  | 4  | 5  | 8  | 4.5    |
| 35                                     |                                  | 3  | 2  | 6  | 2  | 2  | 4  | 2.5    |
| 40                                     |                                  | 1  | 1  | 3  | 1  | 3  | 3  | 2      |
| 45                                     |                                  | 2  | 3  | 1  | 3  | 1  | 2  | 2      |
| 50                                     |                                  | 5  | 10 | 2  | 5  | 4  | 1  | 4.5    |
| 55                                     |                                  | 7  | 5  | 5  | 6  | 9  | 5  | 5.5    |
| 60                                     |                                  | 8  | 8  | 4  | 7  | 6  | 7  | 7      |

**Table S3.** Optimal segmentations determined through visual inspections for Almería study site, summer season, and WorldView-3 orthoimages (Percent and 16Bits). SP: MRS segmentation scale. I: Interpreter. The best segmentation (1), the worst (10).

| Ranking based on visual interpretation  |     |    |    |    |    |    |    |        |
|-----------------------------------------|-----|----|----|----|----|----|----|--------|
|                                         | SP  | I1 | I2 | I3 | I4 | I5 | I6 | Median |
| <b>Almeria<br/>June WV3<br/>Percent</b> | 20  | 9  | 10 | 10 | 10 | 10 | 10 | 10.0   |
|                                         | 30  | 5  | 9  | 9  | 9  | 9  | 9  | 9.0    |
|                                         | 40  | 3  | 8  | 3  | 4  | 6  | 3  | 3.5    |
|                                         | 50  | 1  | 3  | 1  | 1  | 4  | 2  | 1.5    |
|                                         | 60  | 2  | 2  | 4  | 2  | 1  | 1  | 2.0    |
|                                         | 70  | 4  | 5  | 2  | 3  | 5  | 4  | 4.0    |
|                                         | 80  | 6  | 4  | 7  | 6  | 7  | 8  | 6.5    |
|                                         | 90  | 7  | 1  | 5  | 5  | 2  | 7  | 5.0    |
|                                         | 100 | 8  | 6  | 6  | 7  | 3  | 6  | 6.0    |
|                                         | 110 | 10 | 7  | 8  | 8  | 8  | 5  | 8.0    |
| <b>Almeria<br/>June WV3<br/>16Bits</b>  | 190 | 9  | 10 | 10 | 10 | 10 | 10 | 10.0   |
|                                         | 245 | 7  | 9  | 9  | 9  | 9  | 9  | 9.0    |
|                                         | 300 | 4  | 8  | 8  | 8  | 8  | 8  | 8.0    |
|                                         | 355 | 3  | 7  | 7  | 7  | 5  | 2  | 6.0    |
|                                         | 410 | 2  | 6  | 6  | 3  | 7  | 7  | 6.0    |
|                                         | 465 | 1  | 5  | 5  | 1  | 6  | 6  | 5.0    |
|                                         | 520 | 5  | 4  | 1  | 2  | 3  | 1  | 2.5    |
|                                         | 575 | 6  | 3  | 2  | 4  | 4  | 5  | 4.0    |
|                                         | 630 | 8  | 2  | 3  | 5  | 2  | 4  | 3.5    |
|                                         | 685 | 10 | 1  | 4  | 6  | 1  | 3  | 3.5    |

**Table S4.** Optimal segmentations determined through visual inspections for Almería study site, summer season, and Sentinel-2 orthoimages (Percent and 16Bits). SP: MRS segmentation scale. I: Interpreter. The best segmentation (1), the worst (10).

| Ranking based on visual interpretation |                                       |    |    |    |    |    |    |        |
|----------------------------------------|---------------------------------------|----|----|----|----|----|----|--------|
|                                        | SP                                    | I1 | I2 | I3 | I4 | I5 | I6 | Median |
| <b>Almeria<br/>June S2<br/>Percent</b> | 2                                     | 10 | 10 | 10 | 6  | 10 | 10 | 10.0   |
|                                        | 3                                     | 7  | 9  | 9  | 2  | 9  | 9  | 9.0    |
|                                        | 4                                     | 6  | 8  | 8  | 10 | 8  | 8  | 8.0    |
|                                        | 5                                     | 4  | 7  | 3  | 3  | 3  | 2  | 3.0    |
|                                        | 6                                     | 2  | 6  | 1  | 4  | 7  | 1  | 3.0    |
|                                        | 7                                     | 1  | 1  | 4  | 7  | 6  | 3  | 3.5    |
|                                        | 8                                     | 3  | 5  | 2  | 1  | 2  | 5  | 2.5    |
|                                        | 9                                     | 5  | 3  | 5  | 8  | 1  | 4  | 4.5    |
|                                        | 10                                    | 8  | 4  | 6  | 9  | 5  | 7  | 6.5    |
|                                        | 11                                    | 9  | 2  | 7  | 5  | 4  | 6  | 5.5    |
|                                        | <b>Almeria<br/>June S2<br/>16Bits</b> | 15 | 10 | 10 | 10 | 8  | 10 | 10     |
| 20                                     |                                       | 9  | 9  | 9  | 3  | 9  | 9  | 9.0    |
| 25                                     |                                       | 8  | 8  | 8  | 6  | 8  | 8  | 8.0    |
| 30                                     |                                       | 7  | 7  | 7  | 1  | 6  | 6  | 6.5    |
| 35                                     |                                       | 6  | 6  | 6  | 10 | 7  | 5  | 6.0    |
| 40                                     |                                       | 4  | 5  | 5  | 5  | 4  | 7  | 5.0    |
| 45                                     |                                       | 3  | 4  | 3  | 4  | 5  | 3  | 3.5    |
| 50                                     |                                       | 1  | 3  | 2  | 9  | 3  | 4  | 3.0    |
| 55                                     |                                       | 2  | 2  | 1  | 2  | 2  | 1  | 2.0    |
| 60                                     |                                       | 5  | 1  | 4  | 7  | 1  | 2  | 3.0    |

**Table S5.** Optimal segmentations determined through visual inspections for Antalya study site, winter season, and SPOT-7 orthoimages (Percent and 16Bits). SP: MRS segmentation scale. I: Interpreter. The best segmentation (1), the worst (10).

| Ranking based on visual interpretation             |     |    |    |    |    |    |    |        |
|----------------------------------------------------|-----|----|----|----|----|----|----|--------|
|                                                    | SP  | I1 | I2 | I3 | I4 | I5 | I6 | Median |
| <b>Antalya<br/>February<br/>SPOT-7<br/>Percent</b> | 15  | 6  | 3  | 5  | 5  | 8  | 9  | 5.5    |
|                                                    | 20  | 4  | 2  | 4  | 3  | 3  | 6  | 3.5    |
|                                                    | 25  | 1  | 1  | 3  | 1  | 5  | 1  | 1.0    |
|                                                    | 30  | 2  | 4  | 1  | 2  | 4  | 2  | 2.0    |
|                                                    | 35  | 3  | 5  | 2  | 4  | 1  | 3  | 3.0    |
|                                                    | 40  | 5  | 6  | 6  | 7  | 2  | 4  | 5.5    |
|                                                    | 45  | 7  | 7  | 7  | 6  | 6  | 5  | 6.5    |
|                                                    | 50  | 8  | 8  | 8  | 8  | 7  | 7  | 8.0    |
|                                                    | 55  | 9  | 9  | 9  | 9  | 9  | 8  | 9.0    |
|                                                    | 60  | 10 | 10 | 10 | 10 | 10 | 10 | 10.0   |
| <b>Antalya<br/>February<br/>SPOT-7<br/>16Bits</b>  | 150 | 10 | 10 | 9  | 10 | 10 | 10 | 10.0   |
|                                                    | 170 | 9  | 9  | 10 | 4  | 9  | 9  | 9.0    |
|                                                    | 190 | 8  | 8  | 7  | 3  | 8  | 8  | 8.0    |
|                                                    | 210 | 7  | 7  | 8  | 1  | 7  | 1  | 7.0    |
|                                                    | 230 | 5  | 6  | 5  | 2  | 1  | 2  | 3.5    |
|                                                    | 250 | 2  | 5  | 3  | 5  | 6  | 4  | 4.5    |
|                                                    | 270 | 1  | 4  | 1  | 6  | 2  | 3  | 2.5    |
|                                                    | 290 | 3  | 2  | 2  | 7  | 4  | 5  | 3.5    |
|                                                    | 310 | 4  | 3  | 6  | 8  | 3  | 6  | 5.0    |
|                                                    | 330 | 6  | 1  | 4  | 9  | 5  | 7  | 5.5    |

**Table S6.** Optimal segmentations determined through visual inspections for Antalya study site, winter season, and Sentinel-2 orthoimages (Percent and 16Bits). I: Interpreter. SP: MRS segmentation scale. I: Interpreter. The best segmentation (1), the worst (10).

| Ranking based on visual interpretation         |                                           |    |    |    |    |    |    |        |
|------------------------------------------------|-------------------------------------------|----|----|----|----|----|----|--------|
|                                                | SP                                        | I1 | I2 | I3 | I4 | I5 | I6 | Median |
| <b>Antalya<br/>February<br/>S2<br/>Percent</b> | 2                                         | 7  | 10 | 10 | 8  | 10 | 7  | 9.0    |
|                                                | 3                                         | 4  | 2  | 9  | 1  | 9  | 6  | 5.0    |
|                                                | 4                                         | 2  | 1  | 4  | 2  | 4  | 1  | 2.0    |
|                                                | 5                                         | 1  | 3  | 3  | 3  | 2  | 2  | 2.5    |
|                                                | 6                                         | 3  | 4  | 2  | 4  | 1  | 3  | 3.0    |
|                                                | 7                                         | 5  | 5  | 1  | 5  | 3  | 4  | 4.5    |
|                                                | 8                                         | 6  | 6  | 5  | 6  | 5  | 5  | 5.5    |
|                                                | 9                                         | 8  | 7  | 7  | 7  | 6  | 8  | 7.0    |
|                                                | 10                                        | 9  | 8  | 6  | 9  | 7  | 9  | 8.5    |
|                                                | 11                                        | 10 | 9  | 8  | 10 | 8  | 10 | 9.5    |
|                                                | <b>Antalya<br/>February<br/>S2 16Bits</b> | 15 | 10 | 10 | 10 | 9  | 10 | 10     |
| 20                                             |                                           | 7  | 9  | 9  | 10 | 8  | 9  | 9.0    |
| 25                                             |                                           | 4  | 3  | 1  | 3  | 1  | 7  | 3.0    |
| 30                                             |                                           | 3  | 4  | 2  | 1  | 2  | 2  | 2.0    |
| 35                                             |                                           | 2  | 1  | 4  | 2  | 3  | 1  | 2.0    |
| 40                                             |                                           | 1  | 5  | 3  | 4  | 4  | 3  | 3.5    |
| 45                                             |                                           | 5  | 2  | 5  | 5  | 5  | 4  | 5.0    |
| 50                                             |                                           | 6  | 6  | 8  | 6  | 7  | 5  | 6.0    |
| 55                                             |                                           | 8  | 7  | 7  | 7  | 6  | 6  | 7.0    |
| 60                                             |                                           | 9  | 8  | 6  | 8  | 9  | 8  | 8.0    |

**Table S7.** Optimal segmentations determined through visual inspections for Antalya study site, summer season, and SPOT-7 orthoimages (Percent and 16Bits). SP: MRS segmentation scale. I: Interpreter. The best segmentation (1), the worst (10).

| Ranking based on visual interpretation         |     |    |    |    |    |    |    |        |
|------------------------------------------------|-----|----|----|----|----|----|----|--------|
|                                                | SP  | I1 | I2 | I3 | I4 | I5 | I6 | Median |
| <b>Antalya<br/>July<br/>SPOT-7<br/>Percent</b> | 15  | 6  | 7  | 10 | 6  | 10 | 9  | 8.0    |
|                                                | 20  | 3  | 4  | 9  | 4  | 5  | 6  | 4.5    |
|                                                | 25  | 1  | 1  | 2  | 1  | 2  | 1  | 1.0    |
|                                                | 30  | 2  | 2  | 1  | 2  | 1  | 2  | 2.0    |
|                                                | 35  | 4  | 3  | 3  | 3  | 3  | 3  | 3.0    |
|                                                | 40  | 5  | 5  | 4  | 5  | 4  | 4  | 4.5    |
|                                                | 45  | 7  | 6  | 5  | 7  | 6  | 5  | 6.0    |
|                                                | 50  | 8  | 8  | 6  | 8  | 7  | 7  | 7.5    |
|                                                | 55  | 9  | 9  | 7  | 9  | 8  | 8  | 8.5    |
|                                                | 60  | 10 | 10 | 5  | 10 | 9  | 10 | 10.0   |
| <b>Antalya<br/>July<br/>SPOT-7<br/>16Bits</b>  | 140 | 10 | 10 | 10 | 8  | 10 | 10 | 10.0   |
|                                                | 170 | 8  | 9  | 9  | 9  | 9  | 9  | 9.0    |
|                                                | 200 | 5  | 8  | 7  | 6  | 5  | 8  | 6.5    |
|                                                | 230 | 3  | 7  | 6  | 3  | 6  | 2  | 4.5    |
|                                                | 260 | 1  | 6  | 5  | 1  | 4  | 1  | 2.5    |
|                                                | 290 | 2  | 5  | 4  | 2  | 1  | 3  | 2.5    |
|                                                | 320 | 4  | 2  | 1  | 4  | 2  | 4  | 3.0    |
|                                                | 350 | 6  | 1  | 2  | 5  | 3  | 5  | 4.0    |
|                                                | 380 | 7  | 3  | 3  | 7  | 7  | 6  | 6.5    |
|                                                | 410 | 9  | 4  | 8  | 10 | 8  | 7  | 8.0    |

**Table S8.** Optimal segmentations determined through visual inspections for Antalya study site, summer season, and Sentinel-2 orthoimages (Percent and 16Bits). SP: MRS segmentation scale. I: Interpreter. The best segmentation (1), the worst (10).

| Ranking based on visual interpretation |                                       |    |    |    |    |    |    |        |      |
|----------------------------------------|---------------------------------------|----|----|----|----|----|----|--------|------|
|                                        | SP                                    | I1 | I2 | I3 | I4 | I5 | I6 | Median |      |
| <b>Antalya<br/>July S2<br/>Percent</b> | 3                                     | 4  | 6  | 10 | 10 | 10 | 8  | 9.0    |      |
|                                        | 4                                     | 2  | 5  | 9  | 1  | 7  | 7  | 6.0    |      |
|                                        | 5                                     | 1  | 2  | 8  | 2  | 2  | 1  | 2.0    |      |
|                                        | 6                                     | 3  | 1  | 2  | 3  | 1  | 2  | 2.0    |      |
|                                        | 7                                     | 5  | 3  | 1  | 4  | 4  | 3  | 3.5    |      |
|                                        | 8                                     | 6  | 7  | 5  | 5  | 3  | 4  | 5.0    |      |
|                                        | 9                                     | 7  | 8  | 3  | 6  | 6  | 5  | 6.0    |      |
|                                        | 10                                    | 8  | 4  | 4  | 7  | 5  | 6  | 5.5    |      |
|                                        | 11                                    | 9  | 10 | 6  | 8  | 8  | 9  | 8.5    |      |
|                                        | 12                                    | 10 | 9  | 7  | 9  | 9  | 10 | 9.0    |      |
|                                        | <b>Antalya<br/>July S2<br/>16Bits</b> | 25 | 9  | 10 | 10 | 10 | 10 | 10     | 10.0 |
|                                        |                                       | 30 | 5  | 9  | 9  | 8  | 9  | 9      | 9.0  |
| 35                                     |                                       | 4  | 8  | 8  | 5  | 8  | 8  | 8.0    |      |
| 40                                     |                                       | 2  | 7  | 7  | 3  | 7  | 2  | 5.0    |      |
| 45                                     |                                       | 1  | 4  | 6  | 1  | 4  | 1  | 2.5    |      |
| 50                                     |                                       | 3  | 2  | 3  | 2  | 1  | 3  | 2.5    |      |
| 55                                     |                                       | 6  | 3  | 5  | 4  | 3  | 4  | 4.0    |      |
| 60                                     |                                       | 7  | 5  | 4  | 6  | 2  | 5  | 5.0    |      |
| 65                                     |                                       | 8  | 6  | 2  | 7  | 5  | 6  | 6.0    |      |
| 70                                     |                                       | 10 | 1  | 1  | 9  | 6  | 7  | 6.5    |      |



**Table S9.** Computed segmentation accuracy metrics and median values of visual rankings for Almería study site, winter season, and WorldView-3 orthoimages (Percent and 16Bits).

|                                       | SP  | Total object number | MED2 (0)     | AFI (0)       | D-index (0)  | ED3 (0)     | F measure (1) | Fitness (0)  | M (1)        | QR (0)       | Median visual ranking |
|---------------------------------------|-----|---------------------|--------------|---------------|--------------|-------------|---------------|--------------|--------------|--------------|-----------------------|
| Almeria<br>December<br>WV3<br>Percent | 35  | 3229                | 0.813        | 0.084         | 0.436        | 0.26        | <b>0.508</b>  | 7.315        | 0.821        | 0.582        | 5.0                   |
|                                       | 40  | 2590                | 0.463        | <b>-0.035</b> | 0.385        | 0.21        | 0.495         | 5.932        | 0.840        | 0.506        | 5.0                   |
|                                       | 45  | 2118                | 0.344        | -0.147        | 0.355        | 0.18        | 0.478         | 4.902        | <b>0.844</b> | 0.464        | 3.0                   |
|                                       | 50  | 1774                | <b>0.341</b> | -0.327        | 0.332        | 0.16        | 0.459         | 4.231        | 0.838        | 0.432        | <b>1.0</b>            |
|                                       | 55  | 1534                | 0.373        | -0.434        | 0.319        | <b>0.15</b> | 0.443         | 3.624        | 0.826        | 0.415        | 3.5                   |
|                                       | 60  | 1341                | 0.493        | -0.616        | <b>0.300</b> | 0.16        | 0.429         | 3.126        | 0.804        | <b>0.401</b> | 4.0                   |
|                                       | 65  | 1189                | 0.655        | -0.856        | 0.308        | 0.17        | 0.407         | 2.684        | 0.781        | 0.415        | 7.0                   |
|                                       | 70  | 1089                | 0.771        | -1.022        | 0.318        | 0.18        | 0.398         | 2.513        | 0.764        | 0.430        | 7.5                   |
|                                       | 75  | 991                 | 0.899        | -1.212        | 0.335        | 0.20        | 0.386         | 2.326        | 0.740        | 0.456        | 9.0                   |
|                                       | 80  | 885                 | 1.115        | -1.520        | 0.364        | 0.22        | 0.373         | <b>2.042</b> | 0.708        | 0.495        | 10.0                  |
| Almeria<br>December<br>WV3<br>16Bits  | 180 | 7206                | 3.430        | 0.413         | 0.604        | 0.40        | 0.500         | 17.547       | 0.696        | 0.818        | 10.0                  |
|                                       | 220 | 5074                | 2.221        | 0.291         | 0.571        | 0.36        | 0.510         | 13.070       | 0.751        | 0.762        | 9.0                   |
|                                       | 260 | 3762                | 1.374        | 0.146         | 0.517        | 0.32        | <b>0.511</b>  | 10.158       | 0.793        | 0.688        | 8.0                   |
|                                       | 300 | 2967                | 0.925        | <b>0.041</b>  | 0.474        | 0.29        | 0.498         | 8.519        | <b>0.807</b> | 0.627        | 6.5                   |
|                                       | 340 | 2358                | 0.668        | -0.106        | 0.437        | 0.26        | 0.479         | 6.801        | 0.804        | 0.578        | 5.5                   |
|                                       | 380 | 1908                | 0.498        | -0.312        | 0.414        | 0.23        | 0.462         | 5.237        | 0.795        | 0.539        | 4.5                   |
|                                       | 420 | 1594                | <b>0.447</b> | -0.413        | 0.388        | 0.21        | 0.446         | 3.637        | 0.788        | 0.506        | <b>2.0</b>            |
|                                       | 460 | 1384                | 0.496        | -0.583        | 0.362        | 0.19        | 0.436         | 2.628        | 0.777        | 0.472        | <b>2.0</b>            |
|                                       | 500 | 1231                | 0.618        | -0.756        | <b>0.360</b> | <b>0.19</b> | 0.422         | 2.163        | 0.763        | <b>0.467</b> | 3.0                   |
|                                       | 540 | 1094                | 0.808        | -1.022        | 0.364        | 0.20        | 0.408         | <b>1.680</b> | 0.740        | 0.479        | 6.0                   |

**Table S10.** Computed segmentation accuracy metrics and median values of visual rankings for Almería study site, winter season, and Sentinel-2 orthoimages (Percent and 16Bits).

|                                      | SP  | Total object number | MED2 (0)     | AFI (0)       | D-index (0)  | ED3 (0)      | F measure (1) | Fitness (0)  | M (1)        | QR (0)       | Median visual ranking |
|--------------------------------------|-----|---------------------|--------------|---------------|--------------|--------------|---------------|--------------|--------------|--------------|-----------------------|
| Almería<br>December<br>S2<br>Percent | 2   | 12345               | 7.601        | 0.701         | 0.661        | 0.463        | 0.335         | 19.375       | 0.496        | 0.908        | 10.0                  |
|                                      | 3   | 5441                | 2.695        | 0.448         | 0.592        | 0.407        | 0.400         | 8.367        | 0.604        | 0.807        | 8.5                   |
|                                      | 4   | 3226                | 1.225        | 0.224         | 0.515        | 0.341        | <b>0.407</b>  | 4.931        | 0.663        | 0.699        | 4.5                   |
|                                      | 5   | 2188                | 0.741        | <b>-0.031</b> | 0.453        | 0.297        | 0.393         | 3.453        | <b>0.677</b> | 0.622        | 2.5                   |
|                                      | 6   | 1603                | <b>0.638</b> | -0.309        | 0.416        | 0.272        | 0.376         | 2.690        | 0.674        | 0.577        | <b>1.5</b>            |
|                                      | 7   | 1283                | 0.749        | -0.550        | <b>0.392</b> | <b>0.258</b> | 0.361         | 2.249        | 0.661        | <b>0.549</b> | 2.5                   |
|                                      | 8   | 1010                | 0.998        | -0.916        | 0.408        | 0.268        | 0.344         | 1.831        | 0.633        | 0.568        | 5.5                   |
|                                      | 9   | 828                 | 1.318        | -1.411        | 0.423        | 0.283        | 0.326         | 1.596        | 0.606        | 0.591        | 5.5                   |
|                                      | 10  | 692                 | 1.834        | -2.028        | 0.444        | 0.302        | 0.317         | 1.441        | 0.577        | 0.621        | 6.5                   |
|                                      | 11  | 579                 | 2.279        | -2.740        | 0.469        | 0.325        | 0.307         | <b>1.332</b> | 0.543        | 0.657        | 7.0                   |
| Almería<br>December<br>S2<br>16Bits  | 15  | 11317               | 6.166        | 0.616         | 0.653        | 0.455        | 0.384         | 26.975       | 0.562        | 0.893        | 10                    |
|                                      | 20  | 6435                | 3.062        | 0.469         | 0.610        | 0.416        | 0.407         | 15.124       | 0.621        | 0.826        | 9                     |
|                                      | 25  | 4134                | 1.638        | 0.325         | 0.560        | 0.370        | <b>0.411</b>  | 9.315        | 0.658        | 0.752        | 6.5                   |
|                                      | 30  | 3018                | 1.106        | 0.123         | 0.521        | 0.336        | 0.407         | 6.418        | 0.678        | 0.698        | 4.5                   |
|                                      | 35  | 2304                | 0.790        | <b>-0.071</b> | 0.488        | 0.306        | 0.390         | 4.895        | 0.682        | 0.654        | 2.5                   |
|                                      | 40  | 1855                | <b>0.698</b> | -0.323        | 0.461        | 0.286        | 0.375         | 3.921        | <b>0.685</b> | 0.620        | <b>2</b>              |
|                                      | 45  | 1526                | 0.774        | -0.657        | 0.448        | <b>0.279</b> | 0.359         | 3.146        | 0.666        | 0.604        | <b>2</b>              |
|                                      | 50  | 1291                | 0.940        | -0.923        | <b>0.446</b> | 0.280        | 0.346         | 2.614        | 0.647        | <b>0.601</b> | 4.5                   |
|                                      | 55  | 1114                | 1.099        | -1.228        | 0.451        | 0.283        | 0.335         | 2.266        | 0.633        | 0.608        | 5.5                   |
| 60                                   | 966 | 1.258               | -1.429       | 0.459         | 0.289        | 0.326        | <b>2.051</b>  | 0.619        | 0.619        | 7            |                       |

**Table S11.** Computed segmentation accuracy metrics and median values of visual rankings for Almería study site, summer season, and WorldView-3 orthoimages (Percent and 16Bits).

|                                | SP  | Total object number | MED2 (0)     | AFI (0)       | D-index (0)   | ED3 (0)      | F measure (1) | Fitness (0)  | M (1)        | QR (0)       | Median visual ranking |
|--------------------------------|-----|---------------------|--------------|---------------|---------------|--------------|---------------|--------------|--------------|--------------|-----------------------|
| Almería<br>June WV3<br>Percent | 20  | 10429               | 5.720        | 0.558         | 0.625         | 0.434        | 0.446         | 19.049       | 0.620        | 0.868        | 10                    |
|                                | 30  | 4598                | 1.481        | 0.235         | 0.488         | 0.321        | <b>0.523</b>  | 9.956        | 0.811        | 0.667        | 9                     |
|                                | 40  | 2713                | 0.522        | <b>0.035</b>  | 0.379         | 0.214        | 0.497         | 6.264        | 0.861        | 0.505        | 3.5                   |
|                                | 50  | 1991                | <b>0.308</b> | -0.113        | 0.320         | 0.169        | 0.469         | 4.304        | <b>0.866</b> | 0.424        | 1.5                   |
|                                | 60  | 1572                | 0.368        | -0.348        | 0.297         | <b>0.150</b> | 0.446         | 3.359        | 0.842        | 0.393        | 2                     |
|                                | 70  | 1318                | 0.462        | -0.562        | <b>0.295</b>  | 0.153        | 0.432         | 2.711        | 0.818        | 0.392        | 4                     |
|                                | 80  | 1149                | 0.548        | -0.669        | 0.311         | 0.166        | 0.418         | 2.373        | 0.800        | 0.412        | 6.5                   |
|                                | 90  | 1024                | 0.648        | -0.823        | 0.306         | 0.178        | 0.408         | 1.994        | 0.779        | 0.415        | 5                     |
|                                | 100 | 911                 | 0.864        | -1.203        | 0.320         | 0.198        | 0.395         | 1.796        | 0.745        | 0.441        | 6                     |
|                                | 110 | 817                 | 1.106        | -1.504        | 0.347         | 0.219        | 0.379         | 1.695        | 0.712        | 0.479        | 8                     |
| Almería<br>June WV3<br>16Bits  | 190 | 6957                | 3.670        | 0.447         | 0.609         | 0.408        | 0.477         | 15.904       | 0.683        | 0.827        | 10                    |
|                                | 245 | 4515                | 1.931        | 0.299         | 0.549         | 0.354        | <b>0.493</b>  | 10.027       | 0.755        | 0.737        | 9                     |
|                                | 300 | 3174                | 1.075        | 0.155         | 0.485         | 0.298        | 0.489         | 7.122        | 0.802        | 0.646        | 8                     |
|                                | 355 | 2379                | 0.664        | <b>-0.046</b> | 0.445         | 0.255        | 0.468         | 5.196        | 0.812        | 0.585        | 6                     |
|                                | 410 | 1890                | 0.426        | -0.168        | 0.393         | 0.212        | 0.457         | 3.587        | 0.820        | 0.514        | 6                     |
|                                | 465 | 1564                | <b>0.360</b> | -0.357        | 0.356         | 0.182        | 0.441         | 2.895        | <b>0.823</b> | 0.463        | 5                     |
|                                | 520 | 1340                | 0.387        | -0.450        | 0.342         | <b>0.170</b> | 0.427         | 2.335        | 0.818        | 0.443        | 2.5                   |
|                                | 575 | 1162                | 0.545        | -0.671        | 0.325         | 0.177        | 0.415         | 2.067        | 0.795        | 0.430        | 4                     |
|                                | 630 | 1042                | 0.641        | -0.824        | <b>0.3175</b> | 0.175        | 0.406         | 1.646        | 0.786        | 0.424        | 3.5                   |
|                                | 685 | 952                 | 0.734        | -0.921        | 0.3179        | 0.179        | 0.398         | <b>1.521</b> | 0.776        | <b>0.426</b> | 3.5                   |

**Table S12.** Computed segmentation accuracy metrics and median values of visual rankings for Almería study site, summer season, and Sentinel-2 orthoimages (Percent and 16Bits).

|                                | SP                            | Total object number | MED2 (0)     | AFI (0)       | D-index (0)  | ED3 (0)      | F measure (1) | Fitness (0)  | M (1)        | QR (0)       | Median visual ranking |
|--------------------------------|-------------------------------|---------------------|--------------|---------------|--------------|--------------|---------------|--------------|--------------|--------------|-----------------------|
| <b>Almería June S2 Percent</b> | 2                             | 16880               | 11.31        | 0.747         | 0.677        | 0.475        | 0.316         | 31.423       | 0.478        | 0.931        | 10                    |
|                                | 3                             | 7348                | 4.256        | 0.537         | 0.626        | 0.434        | 0.398         | 14.049       | 0.603        | 0.853        | 9                     |
|                                | 4                             | 4256                | 2.035        | 0.321         | 0.560        | 0.381        | <b>0.417</b>  | 8.013        | 0.672        | 0.761        | 8                     |
|                                | 5                             | 2867                | 1.019        | 0.142         | 0.485        | 0.321        | 0.411         | 5.220        | 0.722        | 0.663        | 3                     |
|                                | 6                             | 2113                | 0.689        | <b>-0.080</b> | 0.440        | 0.284        | 0.394         | 3.841        | <b>0.726</b> | 0.603        | 3                     |
|                                | 7                             | 1665                | <b>0.508</b> | -0.286        | 0.400        | 0.254        | 0.380         | 2.986        | 0.725        | 0.551        | 3.5                   |
|                                | 8                             | 1372                | 0.551        | -0.445        | 0.392        | 0.247        | 0.367         | 2.461        | 0.712        | 0.540        | <b>2.5</b>            |
|                                | 9                             | 1139                | 0.641        | -0.661        | 0.385        | <b>0.246</b> | 0.357         | 2.086        | 0.696        | <b>0.534</b> | 4.5                   |
|                                | 10                            | 973                 | 0.832        | -0.954        | <b>0.381</b> | 0.247        | 0.348         | 1.801        | 0.672        | 0.535        | 6.5                   |
|                                | 11                            | 874                 | 1.019        | -1.204        | 0.384        | 0.253        | 0.340         | <b>1.648</b> | 0.658        | 0.542        | 5.5                   |
|                                | <b>Almería June S2 16Bits</b> | 15                  | 18136        | 11.63         | 0.634        | 0.680        | 0.477         | 0.391        | 45.722       | 0.552        | 0.933                 |
| 20                             |                               | 10537               | 6.216        | 0.531         | 0.650        | 0.455        | 0.409         | 29.876       | 0.605        | 0.890        | 9                     |
| 25                             |                               | 6611                | 3.520        | 0.408         | 0.612        | 0.423        | 0.411         | 17.840       | 0.645        | 0.833        | 8                     |
| 30                             |                               | 4633                | 2.197        | 0.280         | 0.579        | 0.393        | <b>0.413</b>  | 12.531       | 0.680        | 0.782        | 6.5                   |
| 35                             |                               | 3469                | 1.400        | 0.162         | 0.543        | 0.361        | 0.403         | 8.985        | 0.693        | 0.729        | 6                     |
| 40                             |                               | 2742                | 1.056        | <b>-0.004</b> | 0.512        | 0.335        | 0.393         | 6.813        | <b>0.696</b> | 0.687        | 5                     |
| 45                             |                               | 2274                | 0.818        | -0.129        | 0.494        | 0.317        | 0.380         | 5.791        | 0.693        | 0.660        | 3.5                   |
| 50                             |                               | 1933                | 0.714        | -0.261        | 0.476        | 0.304        | 0.369         | 4.729        | 0.686        | 0.637        | 3                     |
| 55                             |                               | 1632                | <b>0.698</b> | -0.491        | 0.467        | 0.294        | 0.361         | 3.829        | 0.674        | 0.624        | <b>2</b>              |
| 60                             |                               | 1412                | 0.716        | -0.654        | <b>0.455</b> | <b>0.289</b> | 0.352         | <b>3.424</b> | 0.665        | <b>0.613</b> | 3                     |

**Table S13.** Computed segmentation accuracy metrics and median values of visual rankings for Antalya study site, winter season, and SPOT-7 orthoimages (Percent and 16Bits).

|                                        | SP  | Total object number | MED2 (0)     | AFI (0)       | D-index (0)  | ED3 (0)     | F measure (1) | Fitness (0)  | M (1)        | QR (0)       | Median visual ranking |
|----------------------------------------|-----|---------------------|--------------|---------------|--------------|-------------|---------------|--------------|--------------|--------------|-----------------------|
| <b>Antalya February SPOT-7 Percent</b> | 15  | 9409                | 1.097        | 0.163         | 0.433        | 0.28        | <b>0.516</b>  | 8.624        | 0.829        | 0.598        | 5.5                   |
|                                        | 20  | 5758                | 0.425        | <b>-0.021</b> | 0.328        | 0.19        | 0.490         | 5.064        | <b>0.866</b> | 0.444        | 3.5                   |
|                                        | 25  | 3861                | <b>0.252</b> | <b>-0.316</b> | 0.274        | <b>0.14</b> | 0.446         | 3.592        | 0.852        | 0.369        | <b>1</b>              |
|                                        | 30  | 2813                | 0.338        | <b>-0.523</b> | <b>0.272</b> | <b>0.14</b> | 0.404         | 2.862        | 0.831        | <b>0.366</b> | 2                     |
|                                        | 35  | 2165                | 0.561        | <b>-0.875</b> | 0.297        | 0.17        | 0.364         | 2.186        | 0.783        | 0.404        | 3                     |
|                                        | 40  | 1705                | 0.848        | -1.297        | 0.333        | 0.20        | 0.329         | 1.889        | 0.736        | 0.453        | 5.5                   |
|                                        | 45  | 1341                | 1.307        | -2.149        | 0.360        | 0.23        | 0.292         | 1.552        | 0.680        | 0.500        | 6.5                   |
|                                        | 50  | 1108                | 1.689        | -2.936        | 0.389        | 0.26        | 0.270         | 1.417        | 0.640        | 0.543        | 8                     |
|                                        | 55  | 943                 | 2.415        | -4.295        | 0.422        | 0.29        | 0.248         | 1.336        | 0.589        | 0.596        | 9                     |
|                                        | 60  | 811                 | 2.802        | -4.827        | 0.448        | 0.31        | 0.233         | <b>1.248</b> | 0.559        | 0.633        | 10                    |
| <b>Antalya February SPOT-7 16Bits</b>  | 150 | 5005                | 1.103        | <b>0.018</b>  | 0.508        | 0.30        | <b>0.463</b>  | 6.846        | 0.819        | 0.665        | 10                    |
|                                        | 170 | 4002                | 0.737        | -0.126        | 0.461        | 0.26        | 0.437         | 5.187        | 0.821        | 0.603        | 9                     |
|                                        | 190 | 3319                | 0.576        | -0.288        | 0.433        | 0.24        | 0.422         | 4.540        | 0.819        | 0.563        | 8                     |
|                                        | 210 | 2829                | 0.512        | -0.494        | 0.414        | 0.22        | 0.404         | 4.129        | 0.814        | 0.537        | 7                     |
|                                        | 230 | 2411                | <b>0.505</b> | -0.689        | 0.388        | 0.20        | 0.388         | 3.067        | 0.800        | 0.498        | 3.5                   |
|                                        | 250 | 2103                | 0.586        | -0.819        | 0.376        | <b>0.19</b> | 0.367         | 2.334        | 0.782        | 0.483        | 4.5                   |
|                                        | 270 | 1849                | 0.798        | <b>-1.097</b> | <b>0.364</b> | 0.19        | 0.343         | 1.864        | 0.759        | <b>0.474</b> | <b>2.5</b>            |
|                                        | 290 | 1652                | 0.936        | -1.286        | 0.372        | 0.20        | 0.323         | 1.711        | 0.739        | 0.487        | 3.5                   |
|                                        | 310 | 1498                | 1.005        | -1.364        | 0.372        | 0.20        | 0.312         | 1.503        | 0.732        | 0.488        | 5                     |
|                                        | 330 | 1340                | 1.161        | -1.625        | 0.369        | 0.20        | 0.302         | <b>1.335</b> | <b>0.721</b> | 0.487        | 5.5                   |

**Table S14.** Computed segmentation accuracy metrics and median values of visual rankings for Antalya study site, winter season, and Sentinel-2 orthoimages (Percent and 16Bits).

|                             | SP                         | Total object number | MED 2 (0)    | AFI (0)      | D-index (0)  | ED3 (0)      | F measure (1) | Fitness (0)  | M (1)        | QR (0)       | Median visual ranking |
|-----------------------------|----------------------------|---------------------|--------------|--------------|--------------|--------------|---------------|--------------|--------------|--------------|-----------------------|
| Antalya February S2 Percent | 2                          | 11651               | 2.981        | 0.469        | 0.603        | 0.414        | <b>0.436</b>  | 10.52        | 0.650        | 0.821        | 9                     |
|                             | 3                          | 5279                | 0.817        | <b>0.029</b> | 0.489        | 0.314        | 0.427         | 4.717        | <b>0.711</b> | 0.663        | 5                     |
|                             | 4                          | 3211                | <b>0.496</b> | -0.459       | 0.413        | 0.265        | 0.389         | 2.923        | 0.707        | 0.570        | <b>2</b>              |
|                             | 5                          | 2172                | 0.644        | -0.947       | <b>0.384</b> | <b>0.243</b> | 0.349         | 2.177        | 0.686        | <b>0.534</b> | 2.5                   |
|                             | 6                          | 1599                | 0.979        | -1.569       | 0.388        | 0.258        | 0.311         | 1.673        | 0.647        | 0.547        | 3                     |
|                             | 7                          | 1229                | 1.504        | -2.387       | 0.411        | 0.288        | 0.281         | 1.405        | 0.596        | 0.587        | 4.5                   |
|                             | 8                          | 982                 | 2.000        | -3.133       | 0.440        | 0.308        | 0.259         | 1.252        | 0.561        | 0.628        | 5.5                   |
|                             | 9                          | 798                 | 2.744        | -4.204       | 0.482        | 0.340        | 0.235         | 1.172        | 0.510        | 0.686        | 7                     |
|                             | 10                         | 676                 | 3.322        | -5.032       | 0.510        | 0.360        | 0.218         | 1.136        | 0.477        | 0.723        | 8.5                   |
|                             | 11                         | 580                 | 4.447        | -6.454       | 0.539        | 0.381        | 0.195         | <b>1.096</b> | 0.438        | 0.763        | 9.5                   |
|                             | Antalya February S2 16Bits | 15                  | 10816        | 3.061        | 0.438        | 0.609        | 0.418         | <b>0.449</b> | 12.92        | 0.650        | 0.826                 |
| 20                          |                            | 6287                | 1.454        | 0.263        | 0.554        | 0.367        | 0.436         | 7.210        | 0.690        | 0.742        | 9                     |
| 25                          |                            | 4131                | 0.716        | <b>0.035</b> | 0.496        | 0.313        | 0.410         | 4.630        | <b>0.708</b> | 0.660        | 3                     |
| 30                          |                            | 3005                | <b>0.471</b> | -0.274       | 0.467        | 0.278        | 0.378         | 3.213        | 0.699        | 0.617        | <b>2</b>              |
| 35                          |                            | 2323                | 0.520        | -0.659       | 0.460        | 0.269        | 0.345         | 2.502        | 0.680        | 0.606        | <b>2</b>              |
| 40                          |                            | 1859                | 0.689        | -1.110       | <b>0.457</b> | <b>0.265</b> | 0.325         | 2.015        | 0.671        | <b>0.602</b> | 3.5                   |
| 45                          |                            | 1498                | 1.077        | -1.731       | 0.459        | 0.274        | 0.301         | 1.741        | 0.634        | 0.609        | 5                     |
| 50                          |                            | 1278                | 1.499        | -2.393       | 0.469        | 0.286        | 0.285         | 1.470        | 0.606        | 0.625        | 6                     |
| 55                          |                            | 1108                | 1.981        | -3.052       | 0.478        | 0.302        | 0.260         | 1.315        | 0.576        | 0.643        | 7                     |
| 60                          | 940                        | 2.486               | -4.128       | 0.477        | 0.306        | 0.243        | <b>1.193</b>  | 0.560        | 0.648        | 8            |                       |

**Table S15.** Computed segmentation accuracy metrics and median values of visual rankings for Antalya study site, summer season, and SPOT-7 orthoimages (Percent and 16Bits).

|                            | SP | Total object number | MED 2 (0)    | AFI (0)       | D-index (0)  | ED3 (0)      | F measure (1) | Fitness (0)  | M (1)        | QR (0)       | Median visual ranking |
|----------------------------|----|---------------------|--------------|---------------|--------------|--------------|---------------|--------------|--------------|--------------|-----------------------|
| Antalya July SPOT7 Percent | 15 | 9425                | 1.616        | 0.230         | 0.498        | 0.335        | <b>0.517</b>  | 10.349       | 0.806        | 0.689        | 8                     |
|                            | 20 | 5657                | 0.481        | <b>0.070</b>  | 0.349        | 0.211        | 0.490         | 5.740        | 0.856        | 0.482        | 4.5                   |
|                            | 25 | 4017                | <b>0.215</b> | -0.076        | 0.272        | 0.142        | 0.462         | 4.038        | <b>0.869</b> | 0.371        | <b>1</b>              |
|                            | 30 | 2986                | 0.264        | -0.302        | <b>0.261</b> | <b>0.133</b> | 0.420         | 2.968        | 0.847        | <b>0.357</b> | 2                     |
|                            | 35 | 2351                | 0.404        | -0.612        | 0.298        | 0.150        | 0.388         | 2.369        | 0.812        | 0.398        | 3                     |
|                            | 40 | 1878                | 0.503        | -0.847        | 0.306        | 0.165        | 0.350         | 2.001        | 0.789        | 0.412        | 4.5                   |
|                            | 45 | 1610                | 0.680        | -1.200        | 0.316        | 0.187        | 0.334         | 1.752        | 0.755        | 0.433        | 6                     |
|                            | 50 | 1351                | 1.043        | -1.929        | 0.350        | 0.211        | 0.303         | 1.548        | 0.712        | 0.479        | 7.5                   |
|                            | 55 | 1136                | 1.432        | -2.656        | 0.386        | 0.240        | 0.275         | 1.445        | 0.668        | 0.529        | 8.5                   |
|                            | 60 | 974                 | 1.633        | -2.977        | 0.413        | 0.257        | 0.257         | <b>1.309</b> | 0.642        | 0.562        | 10                    |
| Antalya July SPOT7 16Bits  | 14 | 5644                | 1.617        | 0.193         | 0.545        | 0.343        | <b>0.457</b>  | 9.088        | 0.794        | 0.725        | 10                    |
|                            | 17 | 4148                | 0.938        | 0.065         | 0.483        | 0.289        | 0.435         | 6.220        | 0.826        | 0.639        | 9                     |
|                            | 20 | 3226                | 0.634        | <b>-0.051</b> | 0.434        | 0.253        | 0.401         | 4.326        | 0.831        | 0.575        | 6.5                   |
|                            | 23 | 2606                | 0.403        | -0.183        | 0.388        | 0.213        | 0.373         | 3.274        | <b>0.831</b> | 0.512        | 4.5                   |
|                            | 26 | 2178                | <b>0.346</b> | -0.285        | 0.355        | 0.192        | 0.348         | 2.476        | 0.826        | 0.470        | <b>2.5</b>            |
|                            | 29 | 1882                | 0.396        | -0.493        | 0.360        | 0.189        | 0.331         | 2.311        | 0.813        | 0.473        | <b>2.5</b>            |
|                            | 32 | 1595                | 0.463        | -0.680        | 0.332        | 0.160        | 0.315         | 1.729        | 0.813        | 0.431        | 3                     |
|                            | 35 | 1420                | 0.512        | -0.739        | 0.330        | 0.158        | 0.299         | 1.470        | 0.807        | 0.427        | 4                     |
|                            | 38 | 1229                | 0.664        | -1.014        | <b>0.301</b> | <b>0.155</b> | 0.282         | 1.040        | 0.798        | <b>0.398</b> | 6.5                   |
|                            | 41 | 1108                | 1.221        | -2.305        | 0.309        | 0.172        | 0.269         | <b>0.980</b> | 0.765        | 0.415        | 8                     |

**Table S16.** Computed segmentation accuracy metrics and median values of visual rankings for Antalya study site, summer season, and Sentinel-2 orthoimages (Percent and 16Bits).

|                                | SP | Total object number | MED 2 (0)    | AFI (0)       | D-index (0)  | ED3 (0)      | F measure (1) | Fitness (0)  | M (1)        | QR (0)       | Median visual ranking |
|--------------------------------|----|---------------------|--------------|---------------|--------------|--------------|---------------|--------------|--------------|--------------|-----------------------|
| <b>Antalya July S2 Percent</b> | 3  | 6918                | 1.970        | 0.216         | 0.576        | 0.388        | <b>0.445</b>  | 9.104        | 0.693        | 0.780        | 9                     |
|                                | 4  | 4116                | 0.882        | <b>-0.137</b> | 0.505        | 0.331        | 0.420         | 5.017        | <b>0.715</b> | 0.685        | 6                     |
|                                | 5  | 2817                | <b>0.533</b> | -0.618        | 0.458        | 0.286        | 0.393         | 3.502        | 0.713        | 0.621        | <b>2</b>              |
|                                | 6  | 2100                | 0.586        | -0.889        | <b>0.430</b> | 0.273        | 0.355         | 2.639        | 0.699        | <b>0.587</b> | <b>2</b>              |
|                                | 7  | 1639                | 0.782        | -1.253        | 0.431        | <b>0.272</b> | 0.324         | 2.068        | 0.667        | 0.588        | 3.5                   |
|                                | 8  | 1323                | 1.184        | -1.964        | 0.445        | 0.290        | 0.295         | 1.704        | 0.618        | 0.612        | 5                     |
|                                | 9  | 1126                | 1.481        | -2.517        | 0.454        | 0.302        | 0.276         | 1.572        | 0.592        | 0.628        | 6                     |
|                                | 10 | 930                 | 1.815        | -3.085        | 0.467        | 0.315        | 0.258         | 1.394        | 0.561        | 0.650        | 5.5                   |
|                                | 11 | 809                 | 2.195        | -3.586        | 0.483        | 0.330        | 0.238         | 1.244        | 0.534        | 0.674        | 8.5                   |
|                                | 12 | 689                 | 2.655        | -4.332        | 0.496        | 0.341        | 0.218         | <b>1.148</b> | 0.513        | 0.694        | 9                     |
| <b>Antalya July S2 16Bits</b>  | 25 | 6044                | 2.216        | 0.248         | 0.589        | 0.399        | <b>0.407</b>  | 10.773       | 0.658        | 0.794        | 10                    |
|                                | 30 | 4435                | 1.530        | 0.136         | 0.554        | 0.367        | 0.388         | 6.924        | 0.667        | 0.743        | 9                     |
|                                | 35 | 3359                | 0.973        | <b>-0.053</b> | 0.522        | 0.340        | 0.364         | 5.256        | <b>0.670</b> | 0.699        | 8                     |
|                                | 40 | 2657                | 0.801        | -0.359        | 0.513        | 0.327        | 0.343         | 4.234        | 0.664        | 0.683        | 5                     |
|                                | 45 | 2180                | <b>0.682</b> | -0.634        | 0.501        | 0.319        | 0.330         | 3.438        | 0.647        | 0.669        | <b>2.5</b>            |
|                                | 50 | 1824                | 0.795        | -1.156        | 0.496        | 0.313        | 0.312         | 2.836        | 0.632        | 0.662        | <b>2.5</b>            |
|                                | 55 | 1568                | 0.956        | -1.565        | 0.493        | 0.310        | 0.287         | 2.533        | 0.620        | 0.657        | 4                     |
|                                | 60 | 1378                | 1.211        | -1.937        | 0.490        | 0.309        | 0.270         | 2.129        | 0.602        | 0.656        | 5                     |
|                                | 65 | 1217                | 1.452        | -2.304        | 0.487        | 0.309        | 0.257         | 1.777        | 0.587        | 0.655        | 6                     |
|                                | 70 | 1071                | 1.570        | -2.517        | <b>0.475</b> | <b>0.304</b> | 0.245         | <b>1.599</b> | 0.587        | <b>0.644</b> | 6.5                   |



**Table S17.** Total points (best and worst cases) for each supervised metrics in Almeria study site.

|                  | Almeria December 2020 |                |               |               | Almeria June 2020 |                |               |               | Total Points |
|------------------|-----------------------|----------------|---------------|---------------|-------------------|----------------|---------------|---------------|--------------|
|                  | Best                  |                |               |               | Best              |                |               |               |              |
|                  | WV3<br>Percent        | WV3<br>16 bits | S2<br>Percent | S2<br>16 bits | WV3<br>Percent    | WV3<br>16 bits | S2<br>Percent | S2<br>16 bits |              |
| <b>MED2</b>      | 3                     | 3              | 3             | 3             | 3                 |                | 1             | 3             | 19           |
| <b>AFI</b>       |                       |                | 2             | 2             | 1                 |                | 2             |               | 7            |
| <b>D-index</b>   |                       | 2              | 2             | 1             |                   | 2              |               | 2             | 9            |
| <b>ED3</b>       | 1                     | 2              | 2             | 3             | 2                 | 3              |               | 2             | 15           |
| <b>F measure</b> |                       |                | 1             |               |                   |                |               |               | 1            |
| <b>Fitness</b>   |                       |                |               |               |                   | 2              |               | 2             | 4            |
| <b>M</b>         | 2                     |                | 2             | 3             | 3                 |                | 2             |               | 12           |
| <b>QR</b>        |                       | 2              | 2             | 1             |                   | 2              |               | 2             | 9            |
|                  | Worst                 |                |               |               | Worst             |                |               |               | Total Points |
|                  | WV3<br>Percent        | WV3<br>16 bits | S2<br>Percent | S2<br>16 bits | WV3<br>Percent    | WV3<br>16 bits | S2<br>Percent | S2<br>16 bits |              |
|                  | <b>MED2</b>           | 3              | 3             | 3             | 3                 | 3              | 3             | 3             |              |
| <b>AFI</b>       | 3                     |                | 1             | 1             | 1                 |                |               |               | 6            |
| <b>D-index</b>   |                       | 3              | 3             | 3             | 3                 | 3              | 3             | 3             | 21           |
| <b>ED3 (0)</b>   |                       | 3              | 3             | 3             | 3                 | 3              | 3             | 3             | 21           |
| <b>F measure</b> | 3                     |                | 1             | 1             | 1                 |                | 3             |               | 9            |
| <b>Fitness</b>   |                       | 3              | 3             | 3             | 3                 | 3              | 3             | 3             | 21           |
| <b>M</b>         | 3                     | 3              | 3             | 3             | 3                 | 3              | 3             | 3             | 24           |
| <b>QR</b>        |                       | 3              | 3             | 3             | 3                 | 3              | 3             | 3             | 21           |

**Table S18.** Total points (best and worst cases) for each supervised metrics in Antalya study site.

|                  | Antalya February 2019 |                   |               |               | Antalya July 2019 |                   |               |               | Total Points |
|------------------|-----------------------|-------------------|---------------|---------------|-------------------|-------------------|---------------|---------------|--------------|
|                  | Best                  |                   |               |               | Best              |                   |               |               |              |
|                  | SPOT-7<br>Percent     | SPOT-7<br>16 bits | S2<br>Percent | S2<br>16 bits | SPOT-7<br>Percent | SPOT-7<br>16 bits | S2<br>Percent | S2<br>16 bits |              |
| <b>MED2</b>      | 3                     | 2                 | 3             | 3             | 3                 | 3                 | 3             | 3             | 23           |
| <b>AFI</b>       |                       |                   |               | 2             |                   |                   |               |               | 2            |
| <b>D-index</b>   | 2                     | 3                 | 2             | 1             | 2                 |                   | 3             |               | 13           |
| <b>ED3</b>       | 2                     | 1                 | 2             | 1             | 2                 |                   | 2             |               | 10           |
| <b>F measure</b> |                       |                   |               |               |                   |                   |               |               | 0            |
| <b>Fitness</b>   |                       |                   |               |               |                   |                   |               |               | 0            |
| <b>M</b>         |                       |                   |               | 2             | 3                 |                   |               |               | 5            |
| <b>QR</b>        | 2                     | 3                 | 2             | 1             | 2                 |                   | 3             |               | 13           |
|                  | Worst                 |                   |               |               | Worst             |                   |               |               | Total Points |
|                  | WV3<br>Percent        | WV3<br>16 bits    | S2<br>Percent | S2<br>16 bits | WV3<br>Percent    | WV3<br>16 bits    | S2<br>Percent | S2<br>16 bits |              |
|                  | <b>MED2</b>           | 3                 |               | 3             | 3                 | 3                 | 3             | 3             |              |
| <b>AFI</b>       | 3                     |                   | 3             | 1             | 3                 | 1                 | 3             |               | 14           |
| <b>D-index</b>   | 3                     | 3                 | 2             | 3             | 1                 | 3                 | 3             | 3             | 21           |
| <b>ED3 (0)</b>   | 3                     | 3                 | 2             | 3             | 1                 | 3                 | 3             | 3             | 21           |
| <b>F measure</b> | 3                     |                   | 3             | 1             | 3                 | 1                 | 3             |               | 14           |
| <b>Fitness</b>   |                       | 3                 | 2             | 3             | 1                 | 3                 | 3             | 3             | 18           |
| <b>M</b>         | 3                     |                   | 3             | 1             | 3                 | 1                 | 3             |               | 14           |
| <b>QR</b>        | 3                     | 3                 | 2             | 3             | 1                 | 3                 | 3             | 3             | 21           |

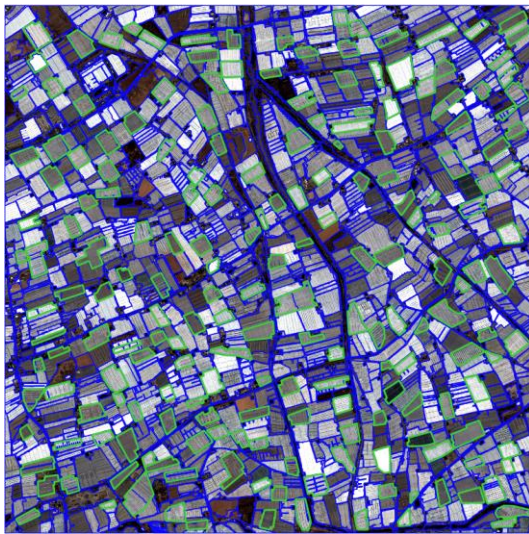

WV3 Almeria summer Percent  
Best segmentation (MED2=0.192): SP=61; Shp=0.1

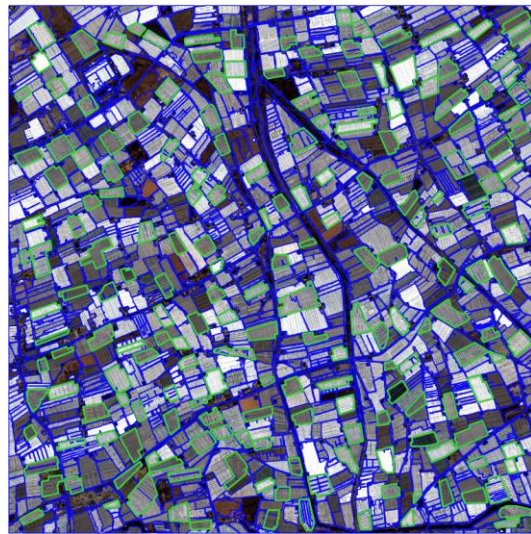

WV3 Almeria summer 16Bits  
Best segmentation (MED2=0.221): SP=195; Shp=0.9

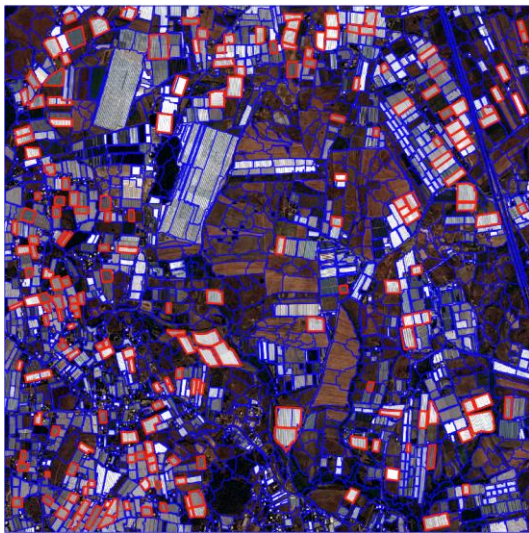

SPOT-7 Antalya summer Percent  
Best segmentation (MED2=0.192): SP=33; Shp=0.3

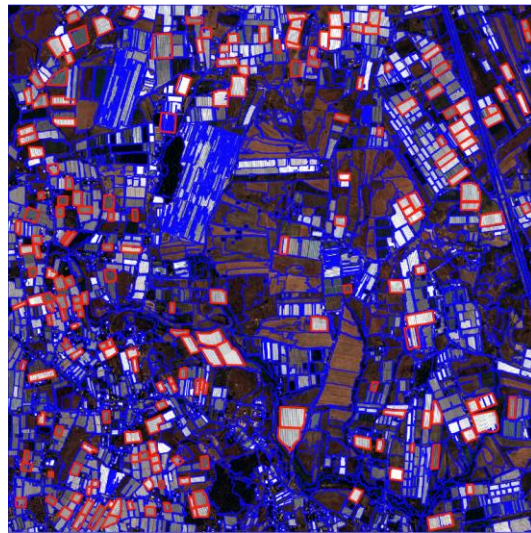

SPOT-7 Antalya summer 16Bits  
Best segmentation (MED2=0.223): SP=215; Shp=0.7

**Figure S1.** High resolution image sources used in Almería and Antalya in summer showing the 200 reference polygons (green in Almería and red in Antalya) and the best segmentation based on MED2 for each case. Scale (SP), shape (Shp) and MED2 value are also shown.

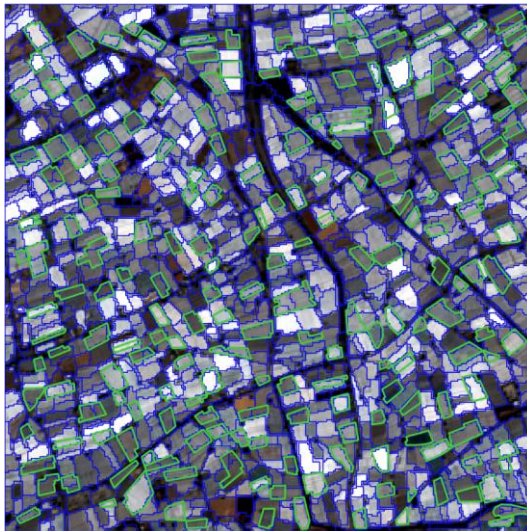

S2 Almeria summer Percent  
Best segmentation (MED2=0.448): SP=7; Shp=0.4

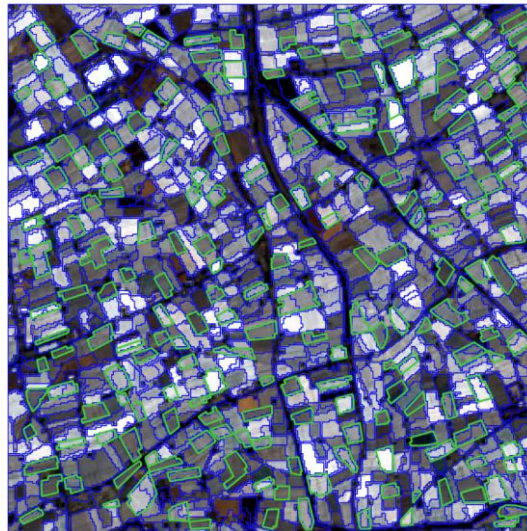

S2 Almeria summer 16Bits  
Best segmentation (MED2=0.546): SP=26; Shp=0.9

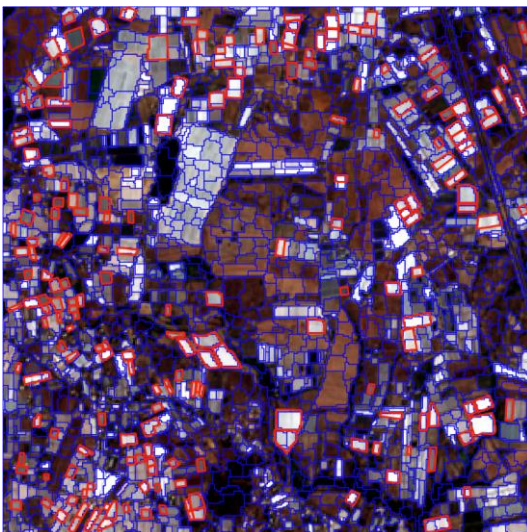

S2 Antalya summer Percent  
Best segmentation (MED2=0.533): SP=5; Shp=0.5

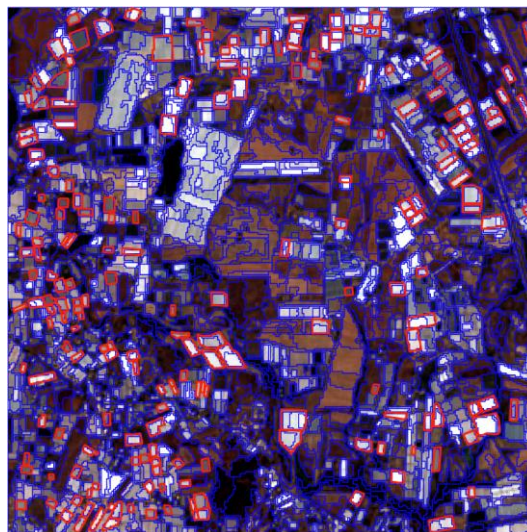

S2 Antalya summer 16Bits  
Best segmentation (MED2=0.581): SP=27; Shp=0.8

**Figure S2.** Medium resolution image sources used in Almería and Antalya in summer showing the 200 reference polygons (green in Almería and red in Antalya) and the best segmentation based on MED2 for each case. Scale (SP), shape (Shp) and MED2 value are also shown.

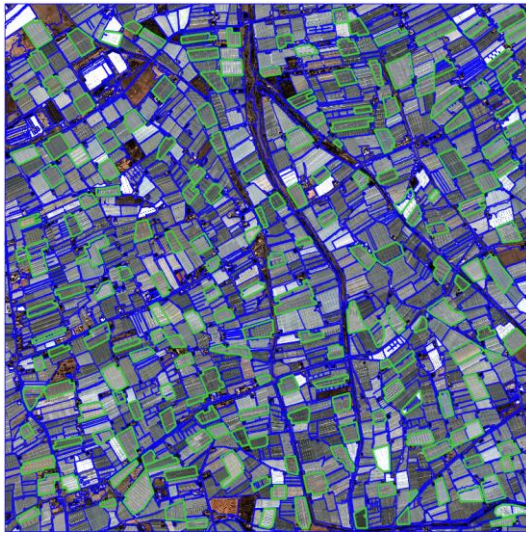

WV3 Almeria winter Percent  
Best segmentation (MED2=0.210): SP=60; Shp=0.1

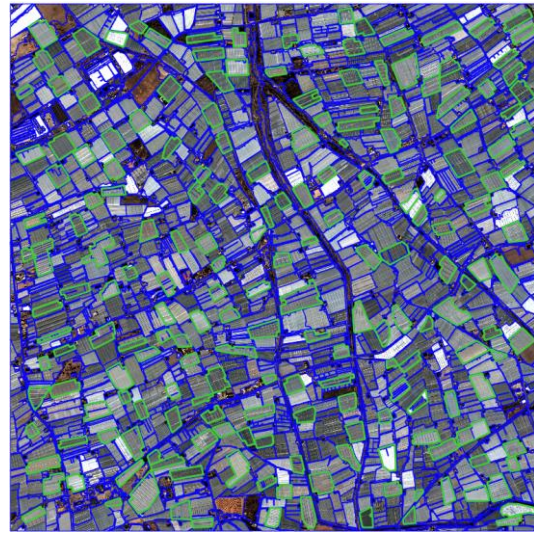

WV3 Almeria winter 16Bits  
Best segmentation (MED2=0.226): SP=196; Shp=0.9

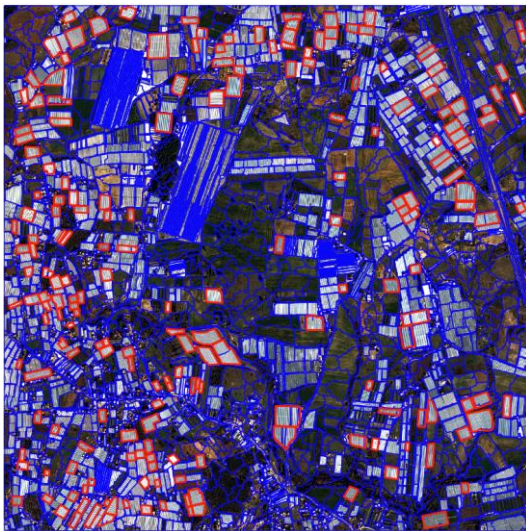

SPOT-7 Antalya winter Percent  
Best segmentation (MED2=0.150): SP=28; Shp=0.2

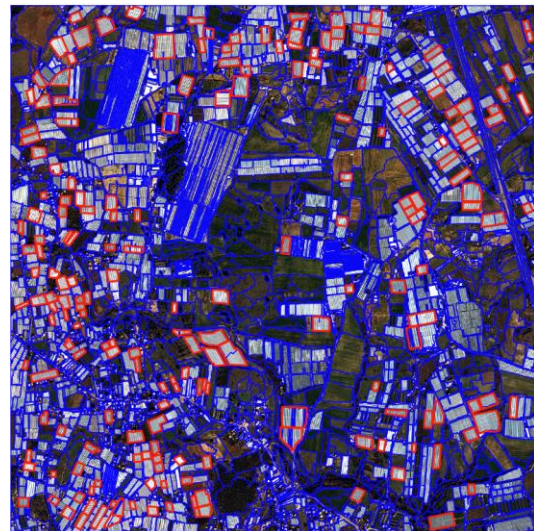

SPOT-7 Antalya winter 16Bits  
Best segmentation (MED2=0.199): SP=104; Shp=0.9

**Figure S3.** High resolution image sources used in Almería and Antalya in winter showing the 200 reference polygons (green in Almería and red in Antalya) and the best segmentation based on MED2 for each case. Scale (SP), shape (Shp) and MED2 value are also shown.

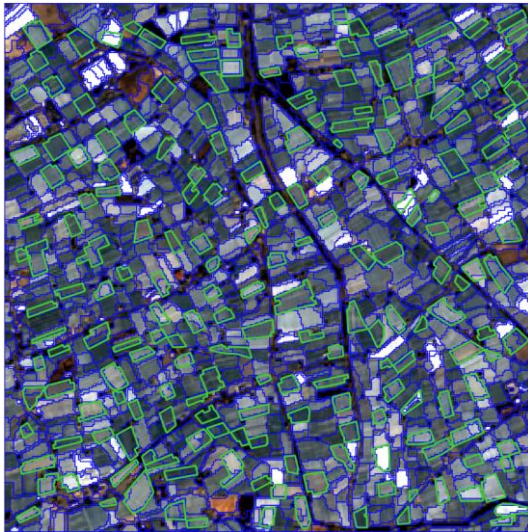

S2 Almeria winter Percent  
Best segmentation (MED2=0.405): SP=6; Shp=0.2

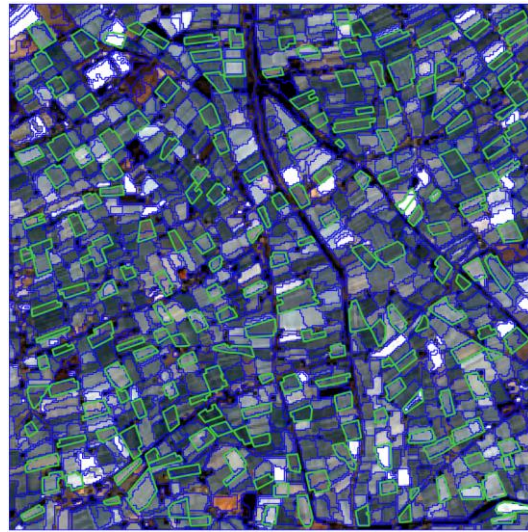

S2 Almeria winter 16Bits  
Best segmentation (MED2=0.437): SP=20; Shp=0.9

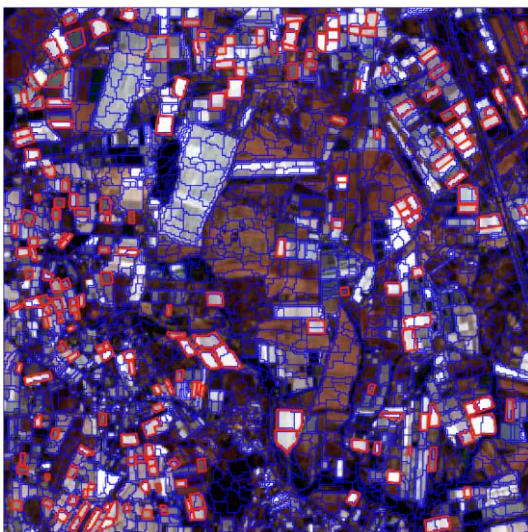

S2 Antalya winter Percent  
Best segmentation (MED2=0.362): SP=4; Shp=0.2

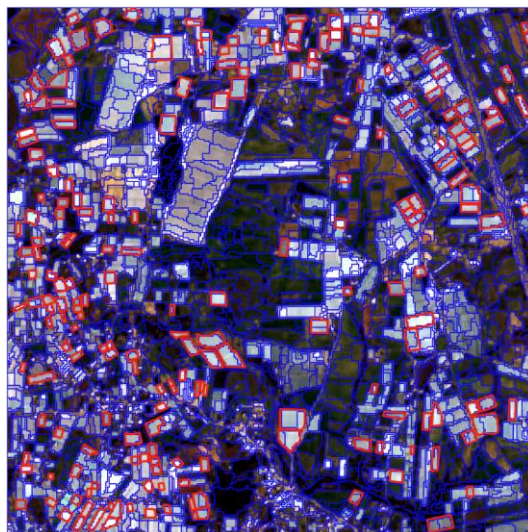

S2 Antalya winter 16Bits  
Best segmentation (MED2=0.397): SP=14; Shp=0.9

**Figure S4.** Medium resolution image sources used in Almería and Antalya in winter showing the 200 reference polygons (green in Almería and red in Antalya) and the best segmentation based on MED2 for each case. Scale (SP), shape (Shp) and MED2 value are also shown.
